# Supplementary material for: High-Performance of Electrocatalytic CO2 Reduction on Defective Graphene-Supported Cu4S2 Cluster
Source: MDPI journal article supplement (doi:10.3390/catal12050454), 2022-04-19
Supplement: s1 [file s1]

# High-Performance of Electrocatalytic CO<sub>2</sub> Reduction on

## Defective Graphene-Supported Cu<sub>4</sub>S<sub>2</sub> Cluster

Qiyang Zhang<sup>1</sup>, Yawei Li<sup>1</sup>, Haiyan Zhu<sup>1\*</sup> and Bingbing Suo<sup>1\*</sup>

<sup>1</sup> Shaanxi Key Laboratory for Theoretical Physics Frontiers, Institute of Modern Physics, Northwest University, Xi'an 710127, China.

Corresponding author\* Haiyan Zhu

Email: [zhuhaiyan@nwu.edu.cn](mailto:zhuhaiyan@nwu.edu.cn)

Corresponding author\* Bingbing Suo

Email: [bsuo@nwu.edu.cn](mailto:bsuo@nwu.edu.cn)

## Global minimum geometry composition research details

The global as well as local minima of cluster configurations for  $\text{Cu}_4\text{X}_2$  and  $\text{Cu}_4\text{X}_4$  clusters ( $\text{X}=\text{O}, \text{S}, \text{Se}$ ) are searched by using the ABCcluster structure prediction program based artificial bee colony algorithm [1-2]. The ABCcluster global search technique employs potential energy function and mainly considers intermolecular Coulomb and Lennard-Jones interactions. In addition, the size of population of trial solution, the scout limit, and the maximum cycle number are required to be set to complete the geometry search [3-5]. The 500 disparate low-lying isomer structures can be generated from the above cluster searching process, and the top fifty low-lying structures are selected to be fully optimized at B3LYP/6-31g (d, p) level preliminarily. At this level, we choose the top 30% lower energy configurations to carry out the vibrational frequencies and Gibbs free energies calculations, and locate the global minima (GM) structure and low-lying energy isomers (ISO). Fig. S1 presents the GM structures of  $\text{Cu}_4\text{X}_2$  ( $\text{X}=\text{O}, \text{S}, \text{Se}$ ) as well as isomers within an energy window ranging from 0.674 up to 1.208 eV above the calculated GM energies. The geometric parameters and the maximum and minimum harmonic vibrational frequencies of the GM structure of the  $\text{Cu}_4\text{X}_2$  cluster are listed in Table S1. Similarly, the global minima structures of  $\text{Cu}_4\text{X}_4$  clusters are also determined via the same methods. In the following research, the global minima geometry composition of  $\text{Cu}_4\text{X}_2$  and  $\text{Cu}_4\text{X}_4$  as shown in Fig. S2 is leveraged as the most stable catalyst for the electrochemical  $\text{CO}_2$  reduction process.

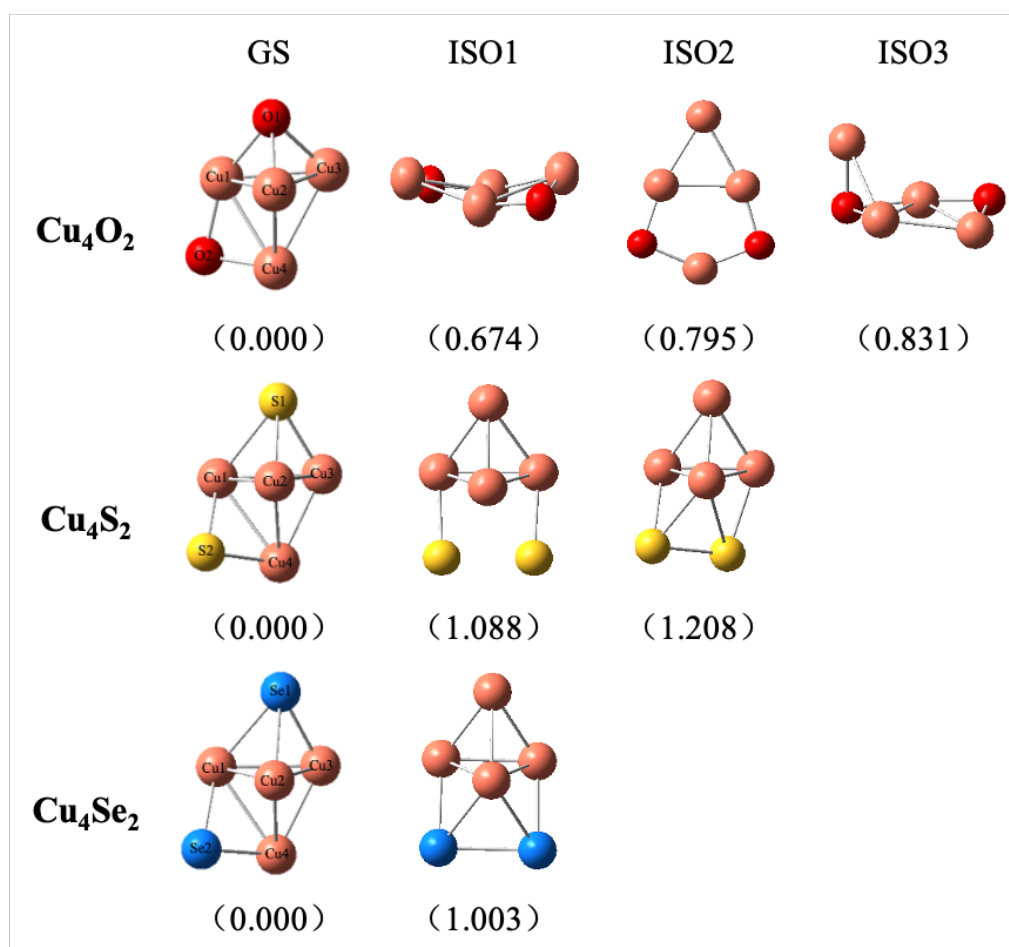

**Figure S1.** The ground minimal (GM) structures and low-lying energy isomers (ISO) of the gas-phase Cu<sub>4</sub>X<sub>2</sub> clusters. The energy differences between the GM geometry and the corresponding isomers are presented by the parenthesis values in eV. (The orange, red, yellow and blue spheres are respectively describing the copper, oxygen, sulfur and selenium atom.)

For the Cu<sub>4</sub>O<sub>2</sub> cluster, the stereoscopic structure of Cu<sub>4</sub> distorts significantly, giving rise to three low-lying energy configurations located +0.674, +0.795, and +0.831 eV above the GS structure. For the sulfur and selenium doped Cu<sub>4</sub>X<sub>2</sub> cluster, the tetrahedral structure of Cu<sub>4</sub> is preserved in all optimized geometries, while the number of the Cu-X bonds is gradually decreasing in the high-energy isomer structures compared with the GM structure. Moreover, the electronegativity of Se is the weakest in three elements, thus Cu<sub>4</sub>Se<sub>2</sub> has less isomers than the other two types of clusters.

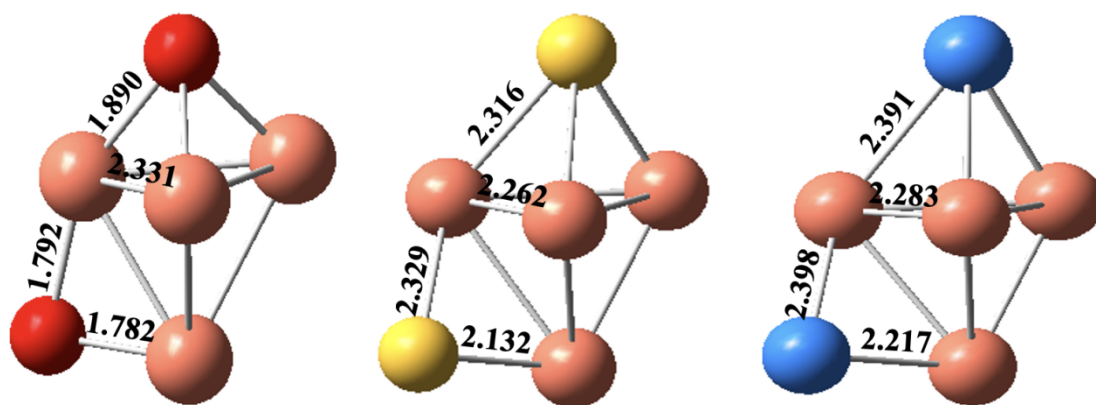

(a)  $\text{Cu}_4\text{X}_2$  clusters

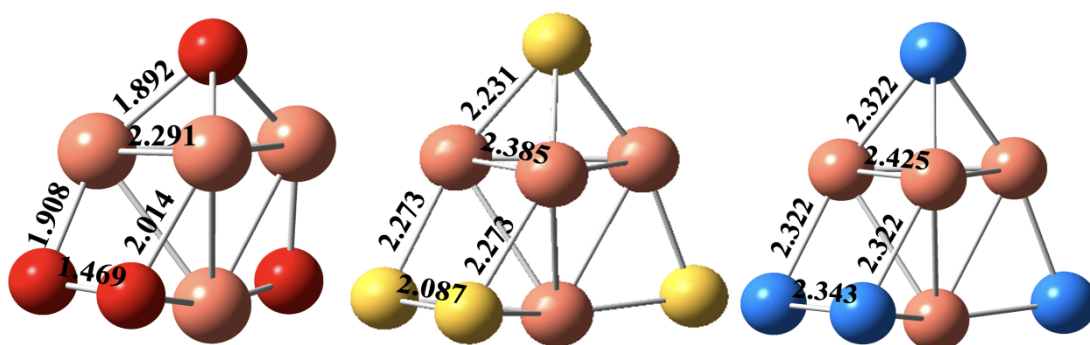

(b)  $\text{Cu}_4\text{X}_4$  clusters

**Figure S2.** Global minimum geometry composition and some selected bond lengths (in Å) of  $\text{Cu}_4\text{X}_2$  clusters (a) and  $\text{Cu}_4\text{X}_4$  clusters (b). Red, yellow, blue, and orange spheres represent O, S, Se, and Cu atoms, respectively.

**Table S1.** Geometric parameters (in Å), the maximum, and minimum harmonic vibrational frequencies (in  $\text{cm}^{-1}$ ) of the GM structure of gas-phase  $\text{Cu}_4\text{X}_2$  clusters.  $\bar{d}_{\text{Cu}_{xy}}$ ,  $\bar{d}_{\text{Cu}_z}$ ,  $\bar{d}_{(\text{Cu}-\text{X}_1)}$ , and  $\bar{d}_{(\text{Cu}-\text{X}_2)}$  refers to the averaged in-plane bond lengths of  $\text{Cu}_{1,2,3}$  atoms, the averaged vertical-axis bond lengths between  $\text{Cu}_{1,2,3}$  and  $\text{Cu}_4$  atom, the averaged bond lengths between  $\text{Cu}_{1,2,3}$  and doped  $\text{X}_1$  atom, and the averaged bond lengths between  $\text{Cu}_{1,4}$  and doped  $\text{X}_2$  atom.

| cluster                                    | $\bar{d}_{\text{Cu}_{xy}}$ | $\bar{d}_{\text{Cu}_z}$ | $\bar{d}_{(\text{Cu}-\text{X}_1)}$ | $\bar{d}_{(\text{Cu}-\text{X}_2)}$ | $\omega_{\text{max}}$ | $\omega_{\text{min}}$ |
|--------------------------------------------|----------------------------|-------------------------|------------------------------------|------------------------------------|-----------------------|-----------------------|
| <b><math>\text{Cu}_4\text{O}_2</math></b>  | 2.340                      | 2.486                   | 1.873                              | 1.787                              | 690.28                | 52.45                 |
| <b><math>\text{Cu}_4\text{S}_2</math></b>  | 2.387                      | 2.445                   | 2.259                              | 2.230                              | 411.83                | 14.51                 |
| <b><math>\text{Cu}_4\text{Se}_2</math></b> | 2.419                      | 2.448                   | 2.335                              | 2.308                              | 329.46                | 15.21                 |

As can be seen in Table S1,  $\bar{d}_{\text{Cu}_{xy}}$ ,  $\bar{d}_{(\text{Cu}-\text{X}_1)}$ , and  $\bar{d}_{(\text{Cu}-\text{X}_2)}$  increase linearly with the decrease of electronegativity of the doped atom in the GM structure, while  $\bar{d}_{\text{Cu}_z}$  decreases about 0.04 Å from  $\text{Cu}_4\text{O}_2$  to  $\text{Cu}_4\text{S}_2$  and  $\text{Cu}_4\text{Se}_2$ . In addition, the positive vibrational frequencies ( $\omega$ ) indicated that the  $\text{Cu}_4\text{X}_2$  geometries are local minima at the PES and have no transition state.

**Table S2.** The charge distribution of elements in the neutral Cu<sub>4</sub>X, Cu<sub>4</sub>X<sub>2</sub>, and Cu<sub>4</sub>X<sub>4</sub> clusters by the natural bond orbital (NBO) charge (e) analysis.

| Cluster                             | Atom | NBO    | Cluster                             | Atom | NBO    | Cluster                              | Atom | NBO    |
|-------------------------------------|------|--------|-------------------------------------|------|--------|--------------------------------------|------|--------|
| <b>Cu<sub>4</sub>O<sup>a)</sup></b> | Cu1  | 0.474  | <b>Cu<sub>4</sub>S<sup>a)</sup></b> | Cu1  | 0.373  | <b>Cu<sub>4</sub>Se<sup>a)</sup></b> | Cu1  | 0.323  |
|                                     | Cu2  | 0.475  |                                     | Cu2  | 0.373  |                                      | Cu2  | 0.323  |
|                                     | Cu3  | 0.475  |                                     | Cu3  | 0.373  |                                      | Cu3  | 0.323  |
|                                     | Cu4  | -0.160 |                                     | Cu4  | -0.013 |                                      | Cu4  | 0.002  |
|                                     | O1   | -1.264 |                                     | S1   | -1.105 |                                      | Se1  | -0.971 |
| <b>Cu<sub>4</sub>O<sub>2</sub></b>  | Cu1  | 0.469  | <b>Cu<sub>4</sub>S<sub>2</sub></b>  | Cu1  | 0.429  | <b>Cu<sub>4</sub>Se<sub>2</sub></b>  | Cu1  | 0.343  |
|                                     | Cu2  | 0.625  |                                     | Cu2  | 0.429  |                                      | Cu2  | 0.343  |
|                                     | Cu3  | 0.625  |                                     | Cu3  | 0.551  |                                      | Cu3  | 0.509  |
|                                     | Cu4  | 0.551  |                                     | Cu4  | 0.550  |                                      | Cu4  | 0.509  |
|                                     | O1   | -1.185 |                                     | S1   | -0.979 |                                      | Se1  | -0.852 |
|                                     | O2   | -1.085 |                                     | S2   | -0.979 |                                      | Se2  | -0.852 |
| <b>Cu<sub>4</sub>O<sub>4</sub></b>  | Cu1  | 0.765  | <b>Cu<sub>4</sub>S<sub>4</sub></b>  | Cu1  | 0.518  | <b>Cu<sub>4</sub>Se<sub>4</sub></b>  | Cu1  | 0.423  |
|                                     | Cu2  | 0.779  |                                     | Cu2  | 0.518  |                                      | Cu2  | 0.423  |
|                                     | Cu3  | 0.827  |                                     | Cu3  | 0.423  |                                      | Cu3  | 0.347  |
|                                     | Cu4  | 0.863  |                                     | Cu4  | 0.407  |                                      | Cu4  | 0.283  |
|                                     | O1   | -1.121 |                                     | S1   | -0.882 |                                      | Se1  | -0.768 |
|                                     | O2   | -0.567 |                                     | S2   | -0.241 |                                      | Se2  | -0.170 |
|                                     | O3   | -0.605 |                                     | S3   | -0.241 |                                      | Se3  | -0.170 |
|                                     | O4   | -0.941 |                                     | S4   | -0.504 |                                      | Se4  | 0.369  |

<sup>a)</sup> Reference [6]

**Table S3.** The charge distribution of elements in the neutral Cu<sub>4</sub>X, Cu<sub>4</sub>X<sub>2</sub>, and Cu<sub>4</sub>X<sub>4</sub> clusters with electrochemical CO<sub>2</sub> adsorption by the natural bond orbital (NBO) charge (e) analysis. The O<sup>1</sup> and O<sup>2</sup> represent the two oxygen atoms of COOH\*.

| Cluster                             | Atom           | NBO    | Cluster                             | Atom           | NBO    | Cluster                              | Atom           | NBO    |
|-------------------------------------|----------------|--------|-------------------------------------|----------------|--------|--------------------------------------|----------------|--------|
| <b>Cu<sub>4</sub>O<sup>a)</sup></b> | Cu1            | 0.537  | <b>Cu<sub>4</sub>S<sup>a)</sup></b> | Cu1            | 0.428  | <b>Cu<sub>4</sub>Se<sup>a)</sup></b> | Cu1            | 0.384  |
|                                     | Cu2            | 0.536  |                                     | Cu2            | 0.428  |                                      | Cu2            | 0.384  |
|                                     | Cu3            | 0.466  |                                     | Cu3            | 0.339  |                                      | Cu3            | 0.302  |
|                                     | Cu4            | 0.223  |                                     | Cu4            | 0.337  |                                      | Cu4            | 0.347  |
|                                     | O1             | -1.187 |                                     | S1             | -0.975 |                                      | Se1            | -0.861 |
|                                     | C              | 0.421  |                                     | C              | 0.432  |                                      | C              | 0.431  |
|                                     | O <sup>1</sup> | -0.721 |                                     | O <sup>1</sup> | -0.719 |                                      | O <sup>1</sup> | -0.719 |
|                                     | O <sup>2</sup> | -0.770 |                                     | O <sup>2</sup> | -0.768 |                                      | O <sup>2</sup> | -0.768 |
|                                     | H              | 0.496  |                                     | H              | 0.499  |                                      | H              | 0.499  |
| <b>Cu<sub>4</sub>O<sub>2</sub></b>  | Cu1            | 0.898  | <b>Cu<sub>4</sub>S<sub>2</sub></b>  | Cu1            | 0.619  | <b>Cu<sub>4</sub>Se<sub>2</sub></b>  | Cu1            | 0.460  |
|                                     | Cu2            | 0.898  |                                     | Cu2            | 0.618  |                                      | Cu2            | 0.638  |
|                                     | Cu3            | 0.448  |                                     | Cu3            | 0.410  |                                      | Cu3            | 0.381  |
|                                     | Cu4            | 0.604  |                                     | Cu4            | 0.543  |                                      | Cu4            | 0.521  |
|                                     | O1             | -1.145 |                                     | S1             | -0.833 |                                      | Se1            | -0.735 |
|                                     | O2             | -1.152 |                                     | S2             | -0.841 |                                      | Se2            | -0.747 |
|                                     | C              | 0.429  |                                     | C              | 0.445  |                                      | C              | 0.444  |
|                                     | O <sup>1</sup> | -0.716 |                                     | O <sup>1</sup> | -0.713 |                                      | O <sup>1</sup> | -0.714 |
|                                     | O <sup>2</sup> | -0.765 |                                     | O <sup>2</sup> | -0.751 |                                      | O <sup>2</sup> | -0.752 |
|                                     | H              | 0.498  |                                     | H              | 0.503  |                                      | H              | 0.503  |
| <b>Cu<sub>4</sub>O<sub>4</sub></b>  | Cu1            | 1.086  | <b>Cu<sub>4</sub>S<sub>4</sub></b>  | Cu1            | 0.845  | <b>Cu<sub>4</sub>Se<sub>4</sub></b>  | Cu1            | 0.482  |
|                                     | Cu2            | 0.844  |                                     | Cu2            | 0.606  |                                      | Cu2            | 0.627  |
|                                     | Cu3            | 1.238  |                                     | Cu3            | 1.015  |                                      | Cu3            | 0.917  |
|                                     | Cu4            | 1.186  |                                     | Cu4            | 0.809  |                                      | Cu4            | 0.747  |
|                                     | O1             | -1.215 |                                     | S1             | -0.908 |                                      | Se1            | -0.758 |

|                |        |                |        |                |        |
|----------------|--------|----------------|--------|----------------|--------|
| O2             | -0.647 | S2             | -0.408 | Se2            | -0.342 |
| O3             | -0.645 | S3             | -0.422 | Se3            | -0.284 |
| O4             | -1.203 | S4             | -0.942 | Se4            | -0.762 |
| C              | 0.715  | C              | 0.723  | C              | 0.709  |
| O <sup>1</sup> | -0.759 | O <sup>1</sup> | -0.753 | O <sup>1</sup> | -0.790 |
| O <sup>2</sup> | -0.781 | O <sup>2</sup> | -0.760 | O <sup>2</sup> | -0.726 |
| H              | 0.181  | H              | 0.193  | H              | 0.179  |

<sup>a)</sup> Reference [6]



# Feasible reaction pathways of CO<sub>2</sub>RR to methanol or methane on Cu<sub>4</sub>X<sub>2</sub> cluster

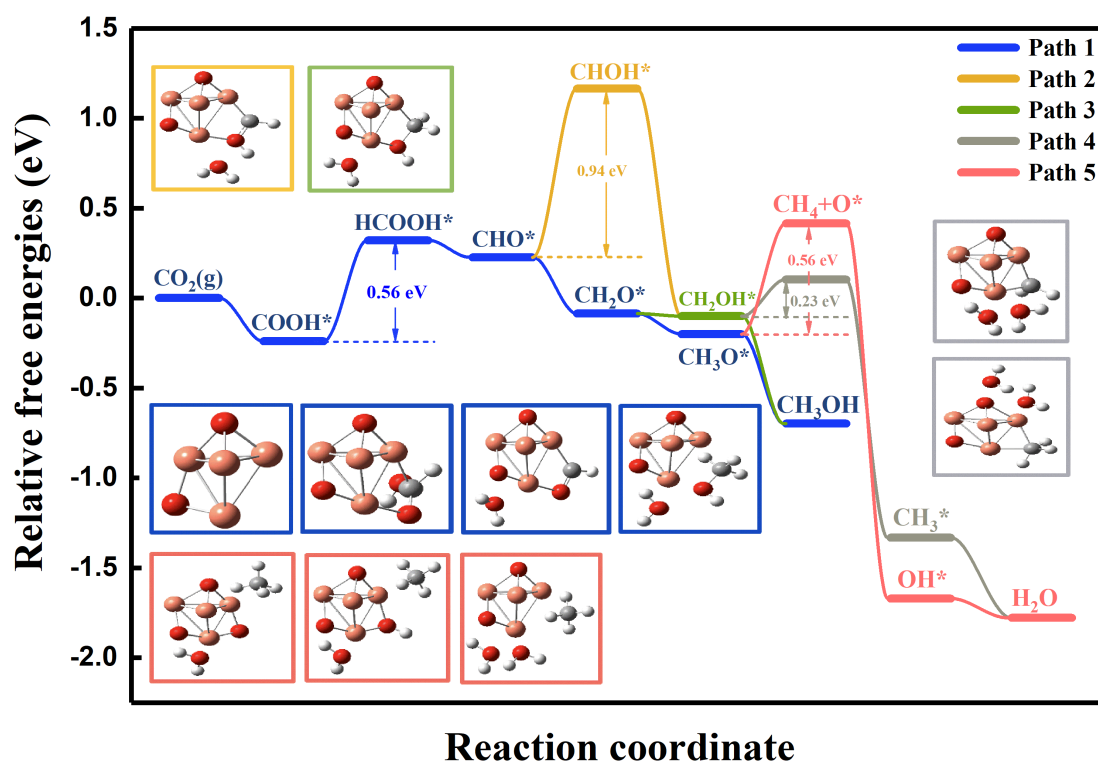

(a)

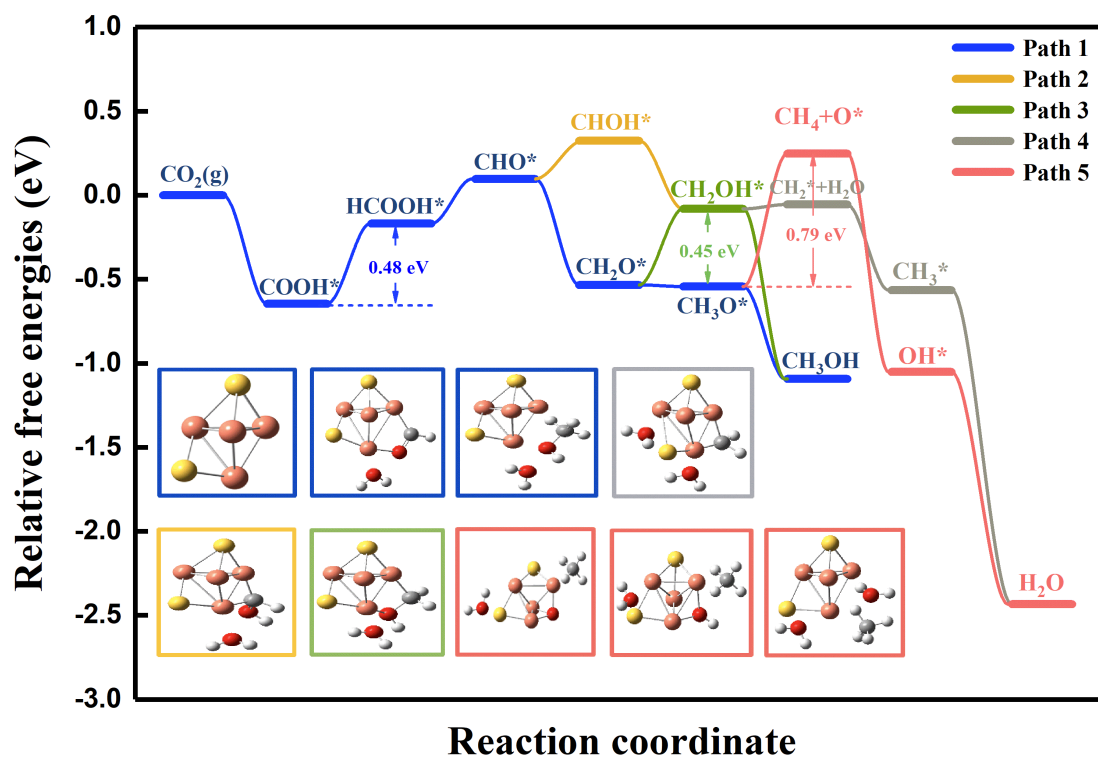

(b)

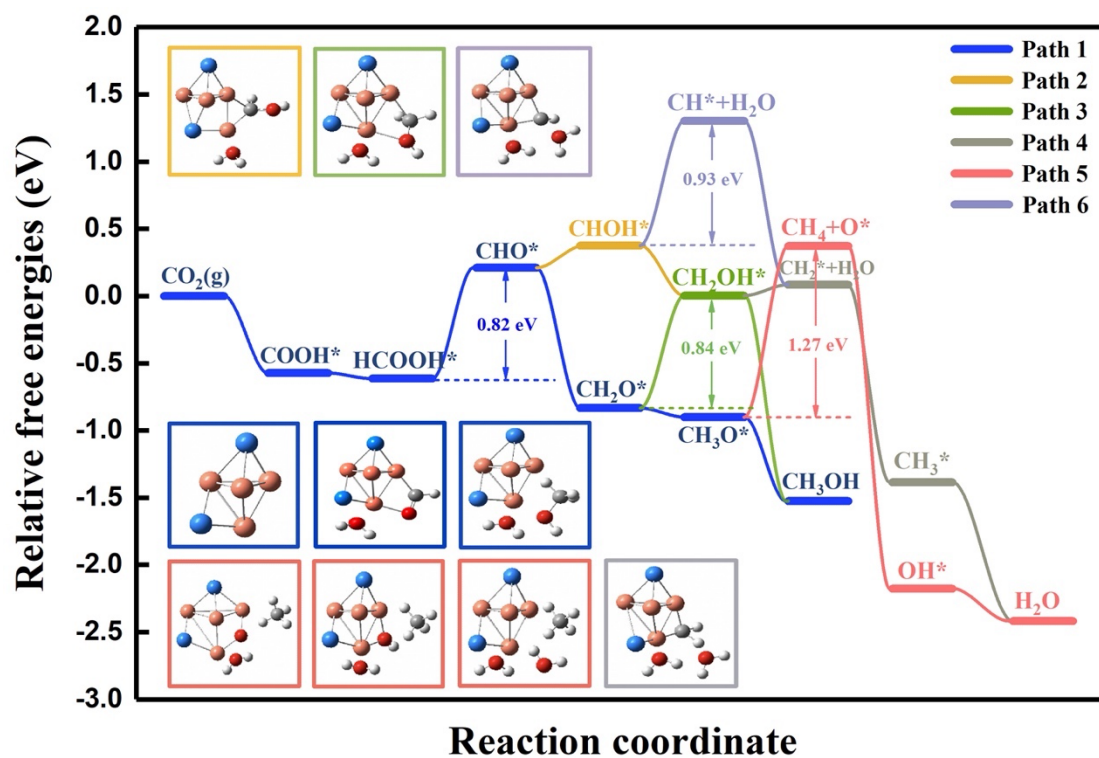

(c)

**Figure S3.** Mechanistic free energies diagram of electrochemical CO<sub>2</sub> reduction on Cu<sub>4</sub>O<sub>2</sub> cluster (a), Cu<sub>4</sub>S<sub>2</sub> cluster (b), and Cu<sub>4</sub>Se<sub>2</sub> cluster (c) with no applied potential. The colorful lines are labeled thermodynamically feasible reaction pathways of CO<sub>2</sub>RR towards methanol and methane. The optimized cluster structures of selected intermediates and final products are shown in insets. Red, yellow, blue, orange, grey, and white spheres represent O, S, Se, Cu, C, and H atoms, respectively.

## Competitive reactions of Cu<sub>4</sub>X<sub>2</sub> cluster

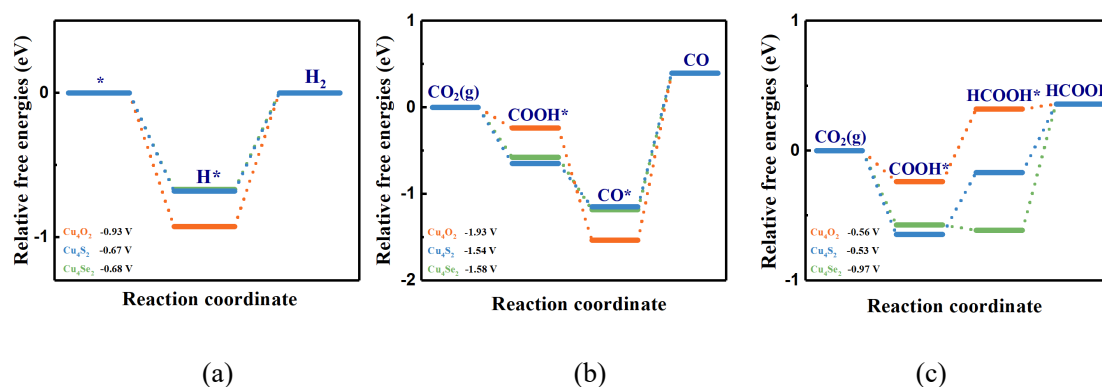

**Figure S4.** Free energies diagram for producing H<sub>2</sub> (a), CO (b), and HCOOH (c) with no applied potential. The orange, blue, and green lines represent Cu<sub>4</sub>O<sub>2</sub>, Cu<sub>4</sub>S<sub>2</sub>, and Cu<sub>4</sub>Se<sub>2</sub> cluster, respectively. The potentials required to carry out over the most endergonic step are listed in the legend.

Among the pathway of CH<sub>3</sub>OH and CH<sub>4</sub> formation, there are other competing reaction pathways that generate H<sub>2</sub>, CO, and HCOOH. They exhibit significant differences in the efficiency and selectivity of CO<sub>2</sub> reduction to different products. Fig. S4(a) shows the pathways for the hydrogen evolution reaction (HER) on these three clusters. The Cu<sub>4</sub>S<sub>2</sub> and Cu<sub>4</sub>Se<sub>2</sub> cluster has small limiting potentials of -0.67 and -0.68 V, respectively, while the Cu<sub>4</sub>O<sub>2</sub> cluster displays a slightly higher limiting potential of -0.93 V for HER. The CO<sub>2</sub> reduction pathway can also produce CO (in Fig. S4(b)) and HCOOH (in Fig. S4(c)). The CO release follows by the path CO<sub>2</sub>→COOH\*→CO\*→CO, and HCOOH is produced by the formation of HCOOH\*. For the CO formation, the step of CO desorption from the cluster corresponds to the rate-determining step with reaction free energy all above 1.5 eV, which indicates that the amount of CO formation in these catalysts is low. The production of HCOOH follows a different trend than the other side reactions. Cu<sub>4</sub>O<sub>2</sub> and Cu<sub>4</sub>S<sub>2</sub> clusters exhibit the limiting potential of about -0.55 V, while the Cu<sub>4</sub>Se<sub>2</sub> cluster has the most negative limiting potential of -0.97 V. It is noteworthy that although the rate-determining step of HCOOH, CH<sub>3</sub>OH, and CH<sub>4</sub> production on the Cu<sub>4</sub>O<sub>2</sub> cluster is all the COOH\*→HCOOH\*, the formation of HCOOH requires an endothermic reaction, whereas the other two paths follow a downhill trend to achieve a more favorable occurrence. Generally speaking, the reactivity order of hydrocarbons production from the CO<sub>2</sub>RR on the Cu<sub>4</sub>X<sub>2</sub> cluster is in the order CH<sub>3</sub>OH > CH<sub>4</sub> > HCOOH > CO.

## Kinetic barrier diagram of key step on Cu<sub>4</sub>X<sub>2</sub> cluster

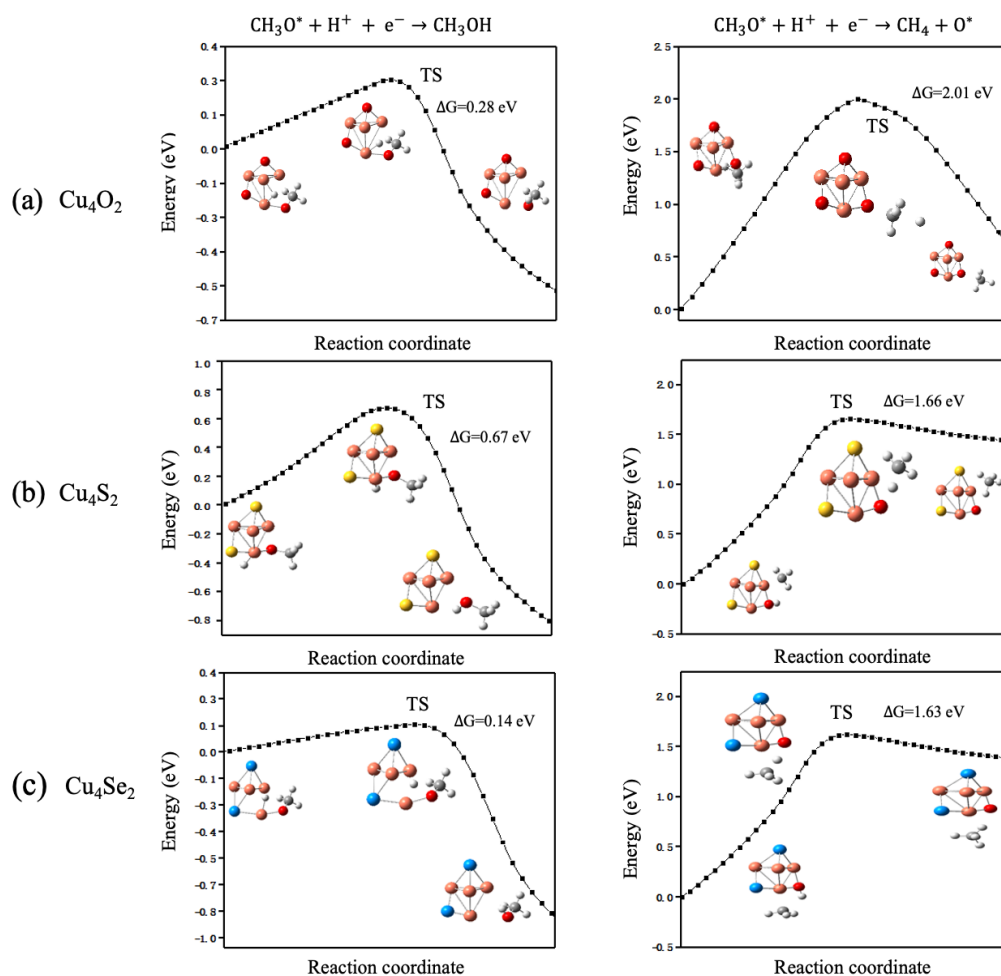

**Figure S5.** Kinetic barrier diagram of product-determining step on Cu<sub>4</sub>O<sub>2</sub> cluster (a), Cu<sub>4</sub>S<sub>2</sub> cluster (b), Cu<sub>4</sub>Se<sub>2</sub> cluster (c). The figure on the left represents the step of  $\text{CH}_3\text{O}^* + \text{H}^+ + \text{e}^- \rightarrow \text{CH}_3\text{OH}$ , and the figure on the right represents the step of  $\text{CH}_3\text{O}^* + \text{H}^+ + \text{e}^- \rightarrow \text{CH}_4 + \text{O}^*$ . The energy barrier is listed in the legend. Red, yellow, blue, and orange spheres represent O, S, Se, and Cu atoms, respectively.

## Feasible reaction pathways of CO<sub>2</sub>RR on Cu<sub>4</sub>X<sub>4</sub> cluster

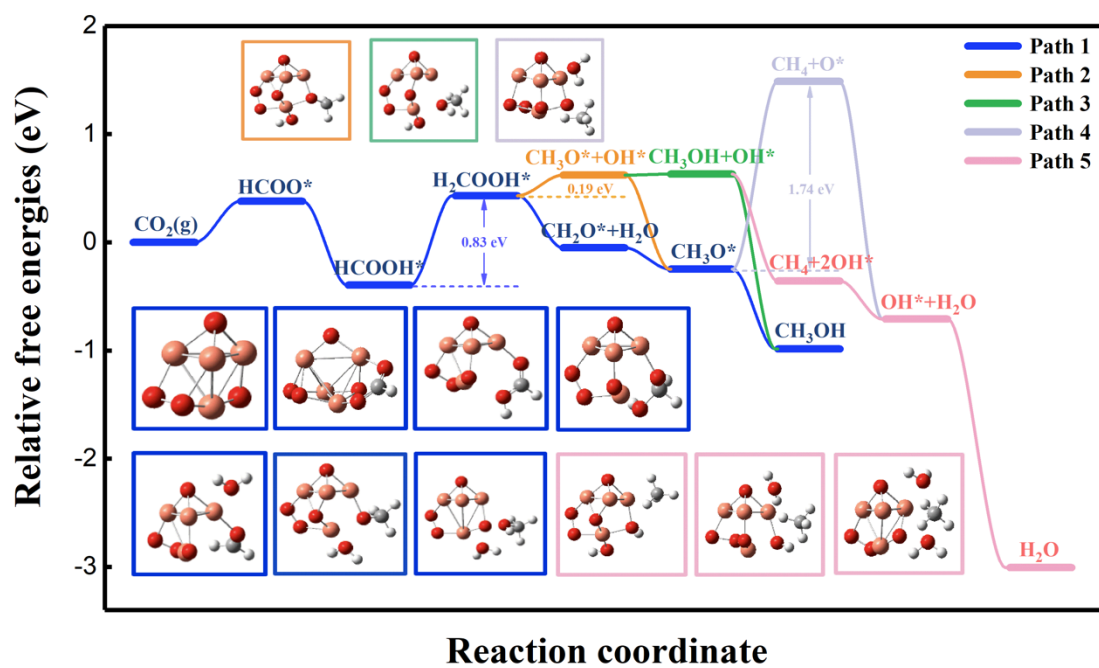

(a)

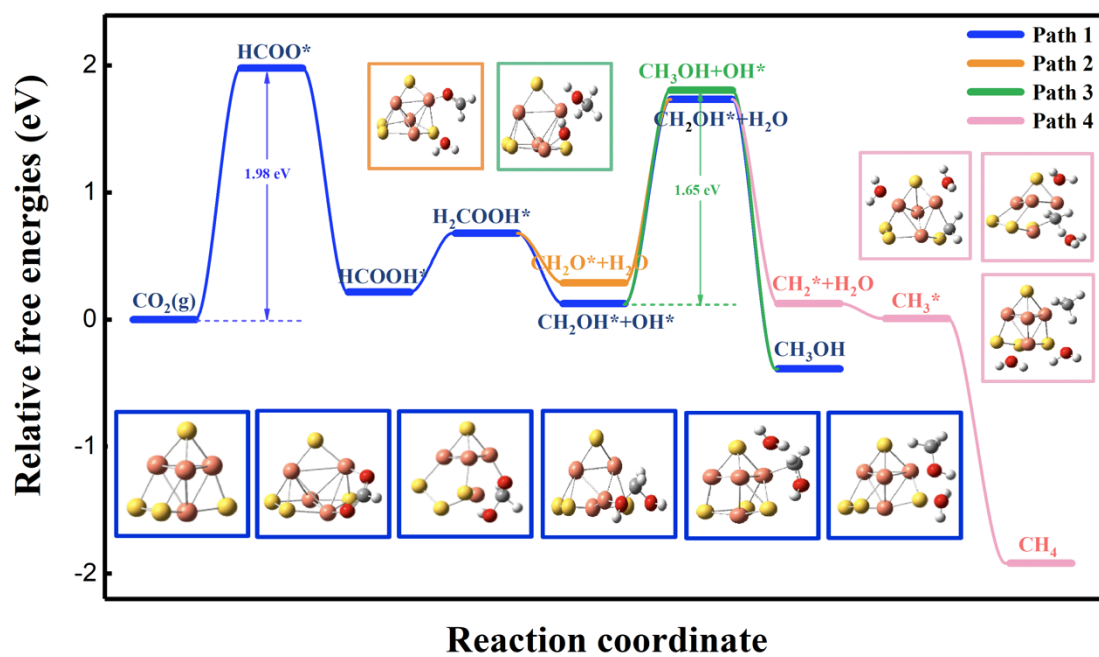

(b)

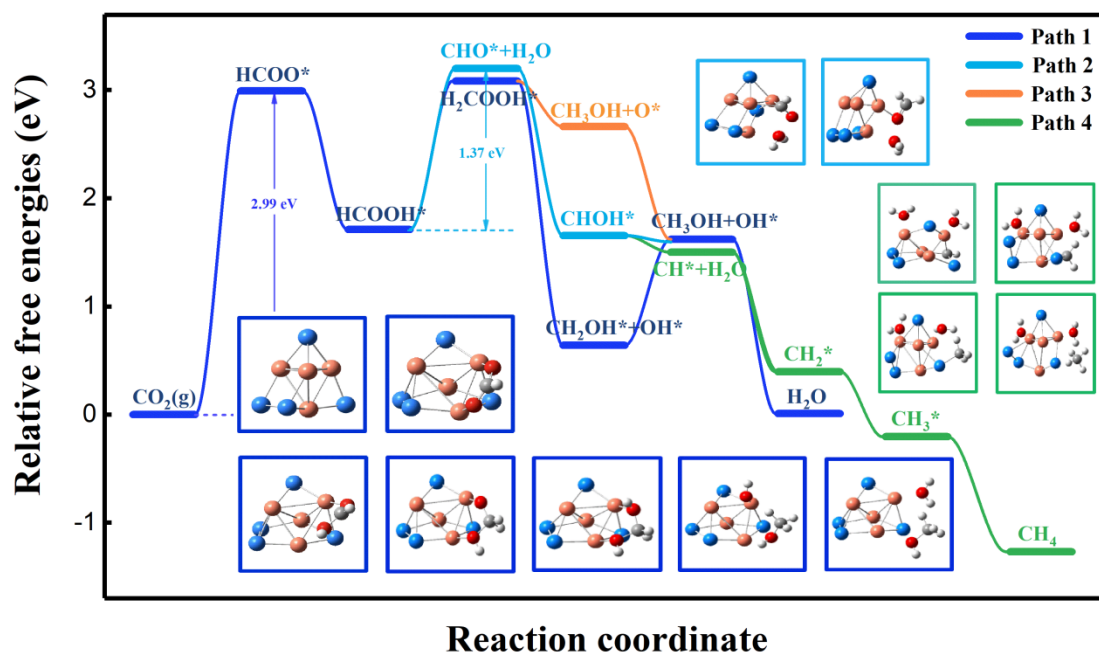

(c)

**Figure S6.** Mechanistic free energies diagram of electrochemical CO<sub>2</sub> reduction on the (a) Cu<sub>4</sub>O<sub>4</sub> cluster, (b) Cu<sub>4</sub>S<sub>4</sub> cluster, and (c) Cu<sub>4</sub>Se<sub>4</sub> cluster with no applied potential. The colorful lines are labeled thermodynamically feasible reaction pathways of CO<sub>2</sub>RR on Cu<sub>4</sub>X<sub>4</sub> cluster. The optimized cluster structures of selected intermediates and final products are shown in insets. Red, yellow, blue, orange, grey, and white spheres represent O, S, Se, Cu, C, and H atoms, respectively.

As shown in Fig. S5, the CO<sub>2</sub> activation is more likely to occur on the C atom for the Cu<sub>4</sub>X<sub>4</sub> cluster, which is the key point that leads to the hydrocarbon pathway follows completely different from that on the Cu<sub>4</sub>X<sub>2</sub> clusters. In the CO<sub>2</sub>RR pathway on the Cu<sub>4</sub>O<sub>4</sub> cluster, the rate-determining step is the hydrogenation of HCOOH\* with a limiting potential of -0.83 V. For the Cu<sub>4</sub>S<sub>4</sub> and Cu<sub>4</sub>Se<sub>4</sub> cluster, it is found that the pathway through HCOO\* is not theoretically feasible, due to the reason that the free energy changes of the first protonation step is really high with no applied voltage.

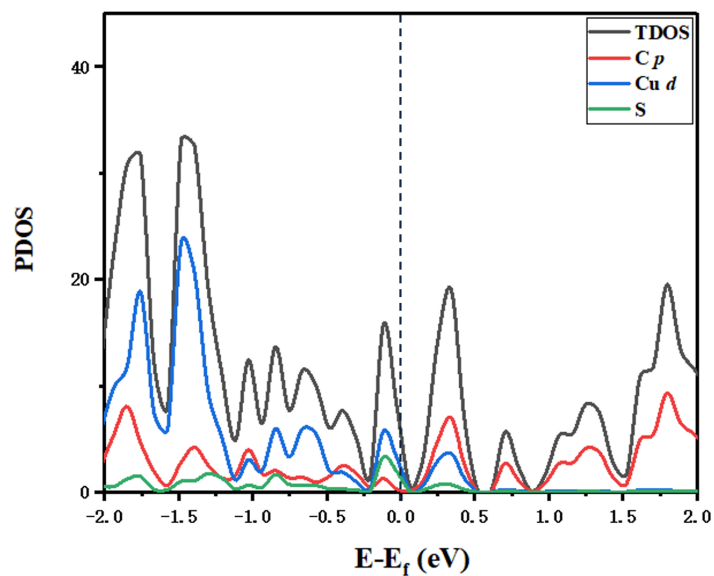

**Figure S7.** Total density of states (DOS) of  $\text{Cu}_4\text{S}_2/\text{SV}$  catalyst, Projected density of states (PDOS) of  $p$  orbitals of C, and PDOS of  $d$  orbitals of Cu. The dash line represents Fermi-level.

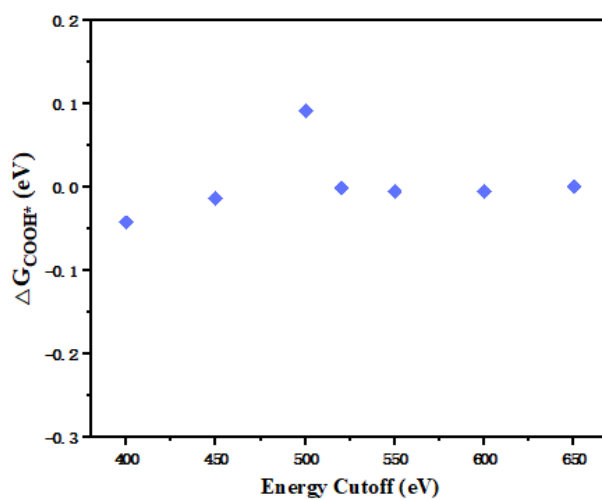

**Figure S8.** Variation the reaction free energy of  $\text{COOH}^*$  on  $\text{Cu}_4\text{S}_2/\text{SV}$  catalyst as a function of the cutoff energy value in the plane-wave calculations. The calculated results at a cutoff of 520 eV is set to reference zero for easy comparison.

## References

- [1] Zhang, J., et al. "NWPEsSe: an Adaptive-Learning Global Optimization Algorithm for Nanosized Cluster Systems." *Journal of Chemical Theory and Computation* (2020).
- [2] Malloum, A., J. J. Fifen, and J. Conradie. "Exploration of the potential energy surface of the ethanol hexamer." *The Journal of Chemical Physics* 150.12(2019).
- [3] Khan, A. M., et al. "Analysis and assessment of the structural, electronic properties of  $(\text{ZrH}_2)_n$  ( $n=5-24$ ) clusters: Density function theory calculations." *Computational and Theoretical Chemistry* 1188(2020):112940.
- [4] Ama, B, and JC A. "Solvent effects on the structures of the neutral ammonia clusters." *Computational and Theoretical Chemistry* 1191(2020).
- [5] Malloum, A., JJ Fifen, and J Conradie. "Large-Sized Ammonia Clusters and Solvation Energies of the Proton in Ammonia." *Journal of Computational Chemistry* (2020).
- [6] Zhang, Q.Y., Zhao Q.F., Zhu, H.Y., Suo B.B., et al. "Computational studies of electrochemical  $\text{CO}_2$  reduction on chalcogen doped  $\text{Cu}_4$  cluster." *International Journal of Hydrogen Energy* 43(2018).
