# Supplementary material for: High-Performance of Electrocatalytic CO2 Reduction on Defective Graphene-Supported Cu4S2 Cluster
Source: MDPI journal article supplement (doi:10.3390/catal12050454), 2022-04-19
Supplement: s1 [file s1]

Archive with 1 entries (1 files):
- catalysts-1661534-supplementary.pdf
